# Supplementary material for: Can a Healthcare Quality Improvement Initiative Reduce Disparity in the Treatment Delay among ST-Segment Elevation Myocardial Infarction Patients with Different Arrival Modes? Evidence from 33 General Hospitals and Their Anticipated Impact on Healthcare during Disasters and Public Health Emergencies
Source: MDPI journal article supplement (doi:10.3390/healthcare9111462), 2021-10-28
Supplement: s1 [file s1]

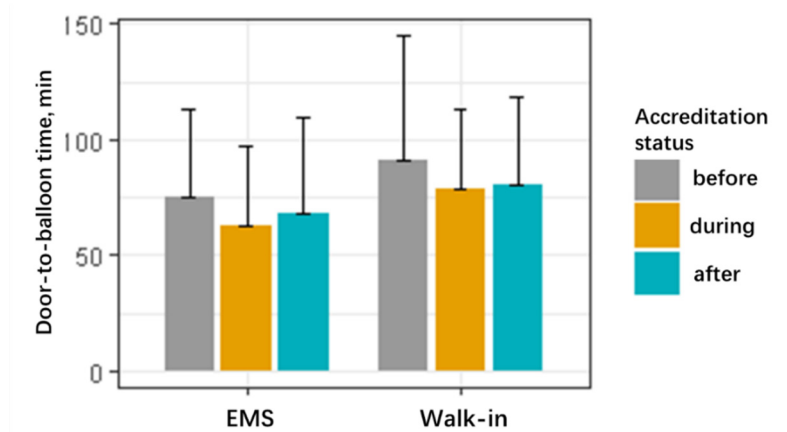

Figure S1. Median and interquartile range of door-to-balloon time by accreditation status and arrival mode.

Table S1. Median and interquartile range of door-to-balloon time (minutes) by accreditation status and arrival mode.

| Accreditation status | Arrival mode |         |
|----------------------|--------------|---------|
|                      | EMS          | Walk-in |
| Before               | 75 (38.2)    | 91 (54) |
| During               | 63 (34)      | 79 (34) |
| After                | 68 (41.5)    | 80 (38) |

Table S2. Odds ratio (OR) and 95% confidence interval (95% CI) of in-hospital delay associated with accreditation status and transfer mode.

|                             | Crude model      |            |                | Adjusted model   |            |                |
|-----------------------------|------------------|------------|----------------|------------------|------------|----------------|
|                             | OR               | 95% CI     | <i>p</i> value | OR               | 95% CI     | <i>p</i> value |
| <b>Accreditation status</b> |                  |            |                |                  |            |                |
| before                      | Reference (OR=1) |            |                | Reference (OR=1) |            |                |
| during                      | 0.36             | 0.28, 0.46 | <0.001         | 0.35             | 0.27, 0.46 | <0.001         |
| after                       | 0.31             | 0.24, 0.41 | <0.001         | 0.29             | 0.21, 0.39 | <0.001         |
| <b>Arrival mode</b>         |                  |            |                |                  |            |                |
| walk-in                     | Reference (OR=1) |            |                | Reference (OR=1) |            |                |
| EMS                         | 0.52             | 0.45, 0.61 | <0.001         | 0.49             | 0.41, 0.58 | <0.001         |

Table S3. Changes in door-to-balloon time and 95% confidence interval (95%CI) associated with accreditation status and transfer mode.

|                             | Crude model             |                |                | Adjusted model          |                |                |
|-----------------------------|-------------------------|----------------|----------------|-------------------------|----------------|----------------|
|                             | $\beta$                 | 95%CI          | <i>p value</i> | $\beta$                 | 95%CI          | <i>p value</i> |
| <b>Accreditation status</b> |                         |                |                |                         |                |                |
| before                      | Reference ( $\beta=0$ ) |                |                | Reference ( $\beta=0$ ) |                |                |
| during                      | -27.48                  | -35.23, -19.74 | <0.001         | -27.87                  | -36.22, -19.57 | <0.001         |
| after                       | -27.56                  | -35.72, -19.37 | <0.001         | -26.55                  | -35.70, -17.45 | <0.001         |
| <b>Arrival mode</b>         |                         |                |                |                         |                |                |
| walk-in                     | Reference ( $\beta=0$ ) |                |                | Reference ( $\beta=0$ ) |                |                |
| EMS                         | -21.79                  | -26.89, -16.72 | <0.001         | -21.62                  | -27.27, -16.10 | <0.001         |

Table S4. Odds ratio (OR) and 95% confidence interval (95% CI) of in-hospital delay associated with accreditation status by arrival mode.

|                | OR        | 95% CI     | <i>p value</i> |
|----------------|-----------|------------|----------------|
| Walk-in-before | reference |            |                |
| Walk-in-during | 0.38      | 0.28, 0.52 | <0.001         |
| Walk-in-after  | 0.25      | 0.18, 0.34 | <0.001         |
| EMS-before     | 0.42      | 0.33, 0.54 | <0.001         |
| EMS-during     | 0.33      | 0.21, 0.53 | 0.368          |
| EMS-after      | 0.67      | 0.51, 0.89 | 0.014          |

Table S5. Changes in door-to-balloon time and 95% confidence interval (95%CI) associated with accreditation status by arrival mode.

|                | $\beta$   | 95% CI         | <i>p value</i> |
|----------------|-----------|----------------|----------------|
| Walk-in-before | reference |                |                |
| Walk-in-during | -31.10    | -41.33, -20.97 | <0.001         |
| Walk-in-after  | -32.90    | -42.98, -22.90 | <0.001         |
| EMS-before     | -30.40    | -38.77, -22.22 | <0.001         |
| EMS-during     | -20.44    | -33.95, -6.93  | 0.215          |
| EMS-after      | -12.39    | -29.18, -11.71 | 0.003          |

Table S6. Odds ratio (OR) and 95% confidence interval (95% CI) of covariates obtained from fully adjusted models.

| Variables                     | OR            | 95%CI       |             |
|-------------------------------|---------------|-------------|-------------|
|                               |               | Lower limit | Upper limit |
| <b>Hospital level</b>         |               |             |             |
| Grade III A                   | 1 (Reference) |             |             |
| Non-grade III A               | 1.265         | 0.576       | 2.776       |
| <b>Time of day of arrival</b> |               |             |             |
| 8 a.m. to 16:59 p.m.          | 1 (Reference) |             |             |
| 17 p.m. to 11:59 p.m.         | 1.324         | 1.105       | 1.586       |
| 12 a.m. to 7:59 a.m.          | 1.374         | 1.148       | 1.644       |

|                                 |         |               |       |       |
|---------------------------------|---------|---------------|-------|-------|
| <b>Day of arrival</b>           |         |               |       |       |
|                                 | Weekday | 1 (Reference) |       |       |
|                                 | Off-day | 1.282         | 1.095 | 1.500 |
| <b>Region</b>                   |         |               |       |       |
|                                 | Urban   | 1 (Reference) |       |       |
|                                 | Suburb  | 0.766         | 0.330 | 1.779 |
| <b>Sex</b>                      |         |               |       |       |
|                                 | Male    | 1 (Reference) |       |       |
|                                 | Female  | 1.157         | 0.951 | 1.408 |
| <b>Age</b>                      |         | 1.006         | 1.000 | 1.013 |
| <b>Sustainable chest pain</b>   |         |               |       |       |
|                                 | No      | 1 (Reference) |       |       |
|                                 | Yes     | 0.408         | 0.267 | 0.623 |
| <b>Intermittent chest pain</b>  |         |               |       |       |
|                                 | No      | 1 (Reference) |       |       |
|                                 | Yes     | 0.526         | 0.332 | 0.835 |
| <b>Chest pain relief</b>        |         |               |       |       |
|                                 | No      | 1 (Reference) |       |       |
|                                 | Yes     | 1.596         | 0.604 | 4.216 |
| <b>Abdominal pain</b>           |         |               |       |       |
|                                 | No      | 1 (Reference) |       |       |
|                                 | Yes     | 0.533         | 0.219 | 1.295 |
| <b>Dyspnea</b>                  |         |               |       |       |
|                                 | No      | 1 (Reference) |       |       |
|                                 | Yes     | 0.889         | 0.407 | 1.942 |
| <b>Shock</b>                    |         |               |       |       |
|                                 | No      | 1 (Reference) |       |       |
|                                 | Yes     | 0.942         | 0.352 | 2.522 |
| <b>Heart failure</b>            |         |               |       |       |
|                                 | No      | 1 (Reference) |       |       |
|                                 | Yes     | 1.488         | 0.452 | 4.894 |
| <b>Malignant arrhythmia</b>     |         |               |       |       |
|                                 | No      | 1 (Reference) |       |       |
|                                 | Yes     | 0.723         | 0.284 | 1.840 |
| <b>Systolic blood pressure</b>  |         | 1.005         | 1.001 | 1.010 |
| <b>Diastolic blood pressure</b> |         | 0.998         | 0.991 | 1.005 |
| <b>Killip class</b>             |         |               |       |       |
|                                 | I       | 1 (Reference) |       |       |
|                                 | II      | 0.984         | 0.732 | 1.321 |
|                                 | III     | 1.571         | 0.720 | 3.429 |
|                                 | IV      | 1.609         | 0.997 | 2.595 |

---

Table S7. Changes in door-to-balloon time (minutes) and 95% confidence interval (95%CI) of covariates obtained from fully adjusted models.

| Variables                      | $\beta$       | 95%CI       |             |
|--------------------------------|---------------|-------------|-------------|
|                                |               | Lower limit | Upper limit |
| <b>Hospital level</b>          |               |             |             |
| Grade III A                    | 1 (Reference) |             |             |
| Non-grade III A                | 9.63          | -12.56      | 32.06       |
| <b>Time of day of arrival</b>  |               |             |             |
| 8 a.m. to 16:59 p.m.           | 1 (Reference) |             |             |
| 17 p.m. to 11:59 p.m.          | -1.75         | -7.71       | 4.16        |
| 12 a.m. to 7:59 a.m.           | 3.67          | -2.28       | 9.57        |
| <b>Day of arrival</b>          |               |             |             |
| Weekday                        | 1 (Reference) |             |             |
| Off-day                        | 2.14          | -3.07       | 7.31        |
| <b>Region</b>                  |               |             |             |
| Urban                          | 1 (Reference) |             |             |
| Suburb                         | -10.86        | -34.82      | 12.79       |
| <b>Sex</b>                     |               |             |             |
| Male                           | 1 (Reference) |             |             |
| Female                         | 3.94          | -2.58       | 10.48       |
| Age                            | 0.11          | -0.11       | 0.32        |
| <b>Sustainable chest pain</b>  |               |             |             |
| No                             | 1 (Reference) |             |             |
| Yes                            | -14.06        | -27.73      | -0.65       |
| <b>Intermittent chest pain</b> |               |             |             |
| No                             | 1 (Reference) |             |             |
| Yes                            | 1.60          | -13.15      | 16.23       |
| <b>Chest pain relief</b>       |               |             |             |
| No                             | 1 (Reference) |             |             |
| Yes                            | 97.49         | 65.17       | 129.26      |
| <b>Abdominal pain</b>          |               |             |             |
| No                             | 1 (Reference) |             |             |
| Yes                            | -9.45         | -39.24      | 20.00       |
| <b>Dyspnea</b>                 |               |             |             |
| No                             | 1 (Reference) |             |             |
| Yes                            | 21.37         | -4.95       | 47.84       |
| <b>Shock</b>                   |               |             |             |
| No                             | 1 (Reference) |             |             |
| Yes                            | 31.70         | 0.81        | 62.54       |
| <b>Heart failure</b>           |               |             |             |
| No                             | 1 (Reference) |             |             |
| Yes                            | -5.89         | -45.74      | 34.03       |
| <b>Malignant arrhythmia</b>    |               |             |             |
| No                             | 1 (Reference) |             |             |

|                                 |     |               |        |       |
|---------------------------------|-----|---------------|--------|-------|
|                                 | Yes | -14.97        | -42.40 | 12.65 |
| <b>Systolic blood pressure</b>  |     | 0.12          | -0.03  | 0.27  |
| <b>Diastolic blood pressure</b> |     | -0.08         | -0.31  | 0.15  |
| <b>Killip class</b>             |     |               |        |       |
|                                 | I   | 1 (Reference) |        |       |
|                                 | II  | 3.15          | -6.02  | 12.42 |
|                                 | III | 8.30          | -15.92 | 32.37 |
|                                 | IV  | 6.33          | -8.92  | 21.63 |

---
